# Supplementary material for: Syntheses of quaternary ammonium-containing, trithiocarbonate RAFT agents and hemi-telechelic cationomers
Source: Royal Society of Chemistry journal article supplement (doi:10.1039/c3py01314f), 2013-11-07
Supplement: c3py01314f.pdf [file c3py01314f.pdf]

## Supporting information

for

### Syntheses of quaternary ammonium containing trithiocarbonate

### RAFT agents and hemi-telechelic cationomers

Longhe Zhang,<sup>a</sup> Lydia R. Cool,<sup>b</sup> Chrys Wesdemiotis,<sup>b</sup> R. A. Weiss<sup>a</sup> and Kevin A. Cavicchi,<sup>\*a</sup>

<sup>a</sup> Department of Polymer Engineering, The University of Akron, Akron, OH, 44325-0301,

USA. Fax: +1 330 972 3406; Tel: +1 330 972 8368; E-mail: kac58@uakron.edu

<sup>b</sup> Department of Chemistry, The University of Akron, Akron, OH, 44325-3601, USA.

This supporting information contains a) the <sup>1</sup>H NMR and ESI spectra of synthesized compounds (Br-NMe<sub>3</sub>, Br-NBu<sub>3</sub>, RAFT-NMe<sub>3</sub>, RAFT-NBu<sub>3</sub>); b) the pseudo-first order kinetic curve of bulk styrene polymerization with RAFT-NMe<sub>3</sub> and RAFT-NBu<sub>3</sub>; c) the kinetic data of bulk styrene polymerization with RAFT-NEt<sub>3</sub> at 65 °C; d) the <sup>1</sup>H NMR data of PBA and PDMAEA.

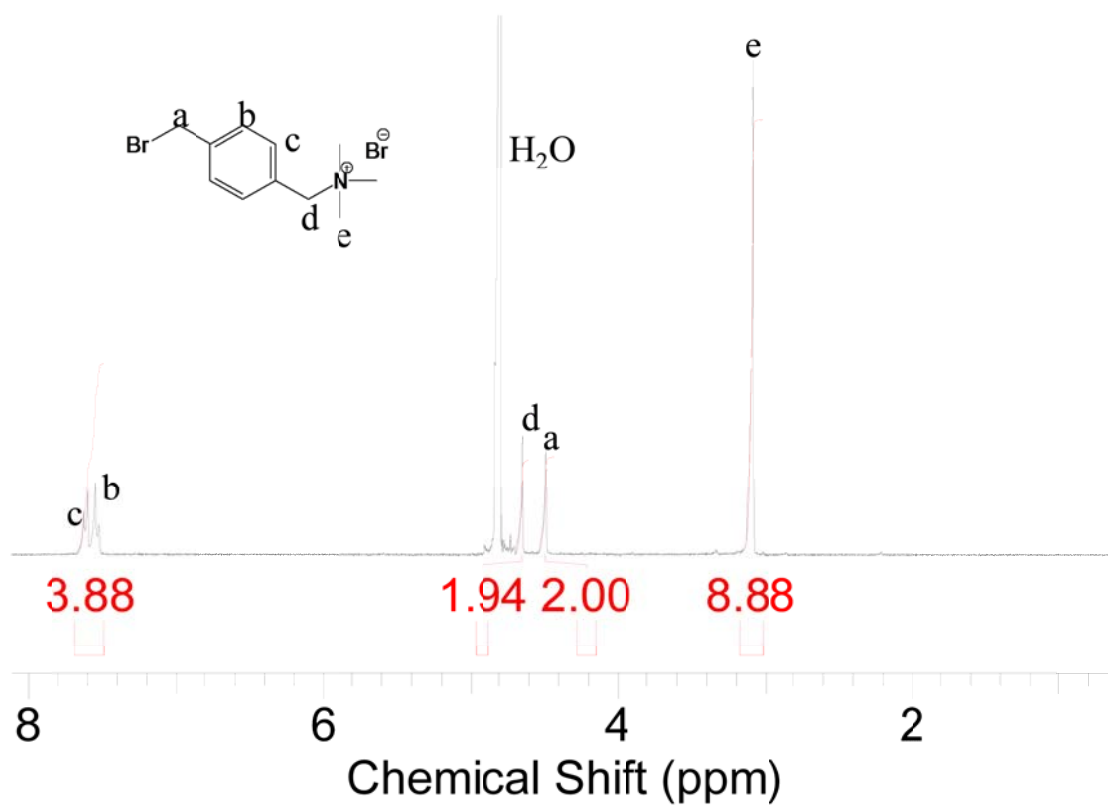

Figure S1. <sup>1</sup>H NMR spectrum in CDCl<sub>3</sub> of Br- Ph-NMe<sub>3</sub>.

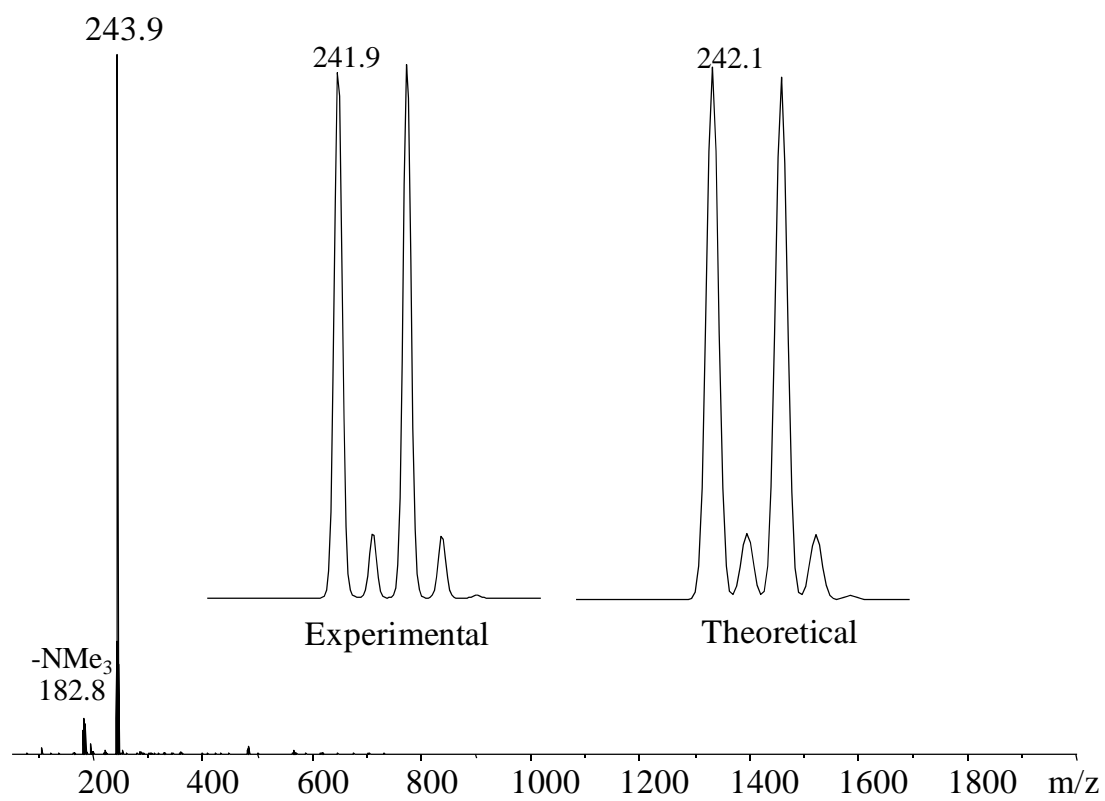

Figure S2. ESI mass spectrum of Br- Ph-NMe<sub>3</sub>.

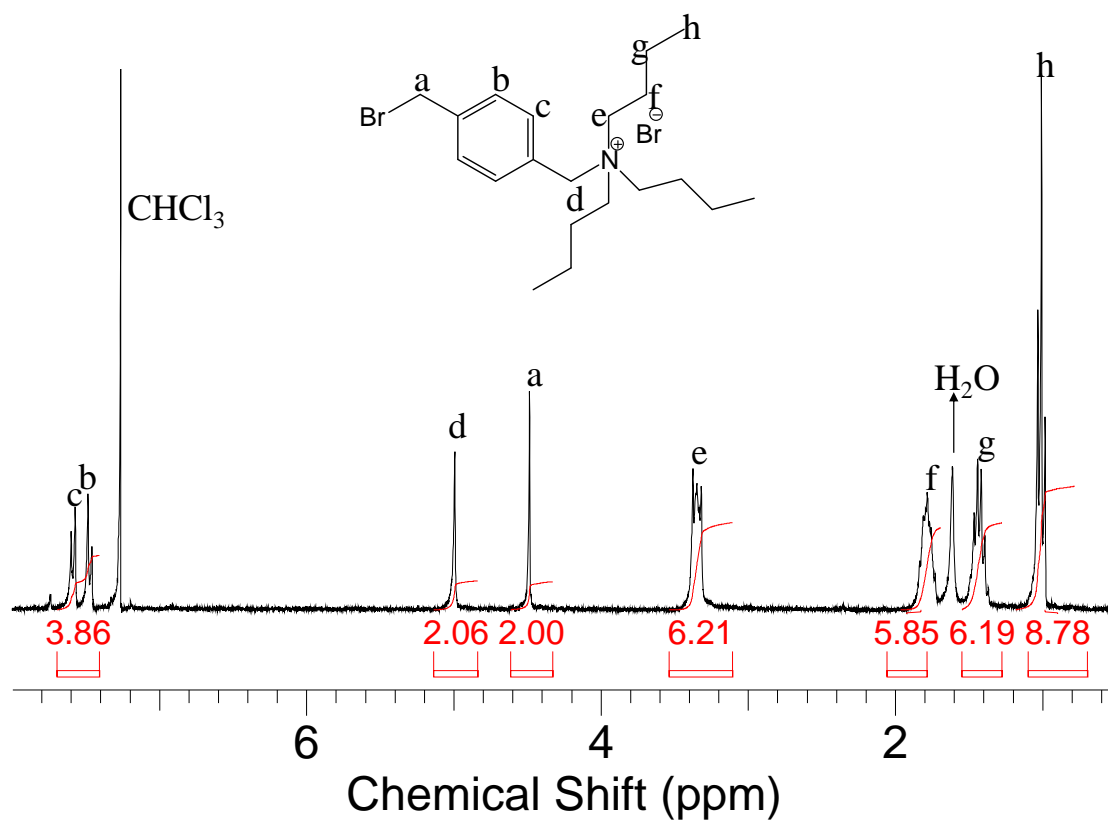

Figure S3.  $^1\text{H}$  NMR spectrum in  $\text{CDCl}_3$  of  $\text{Br- Ph-NBu}_3$ .

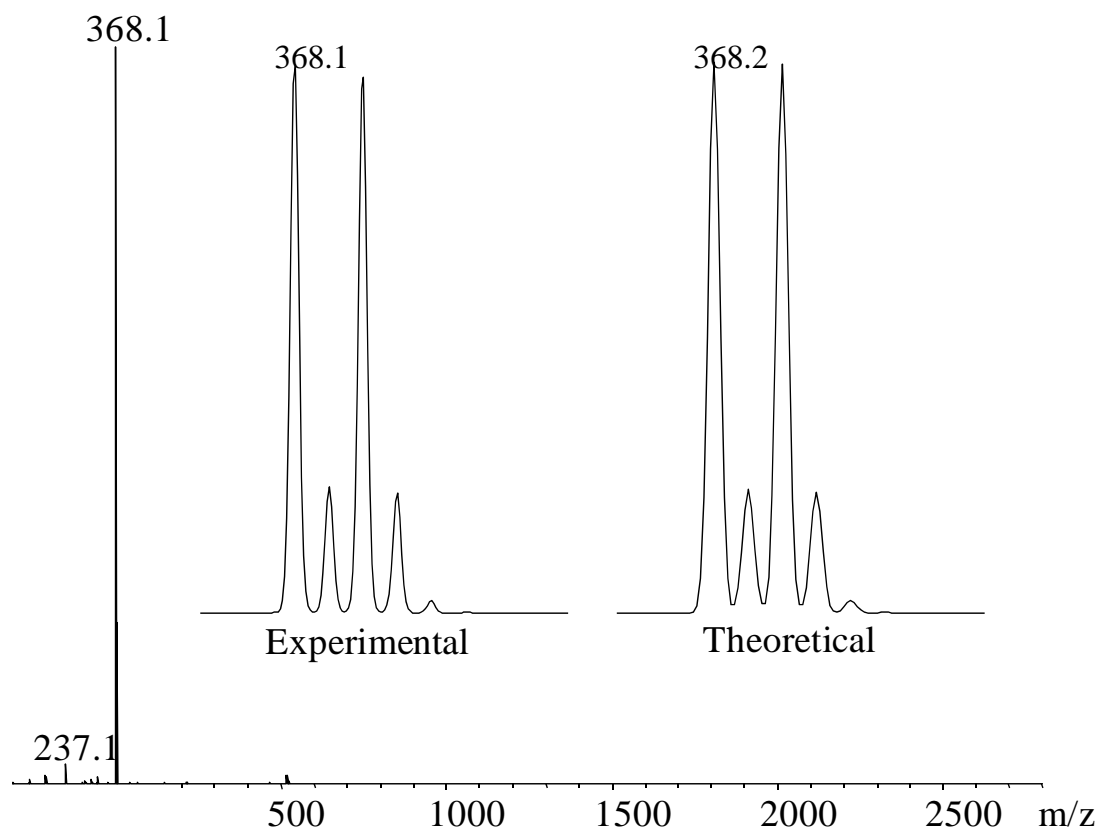

Figure S4. ESI mass spectrum of Br- Ph-NBu<sub>3</sub>. The peak at  $m/z$  237.1 is due to the di-substituted compounds.

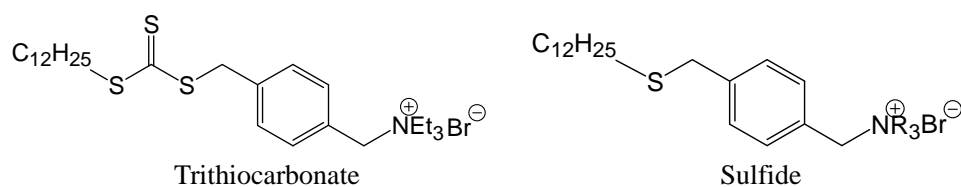

Figure S5. Chemical Structure of RAFT-NEt<sub>3</sub> and the potential sulfide by-product.

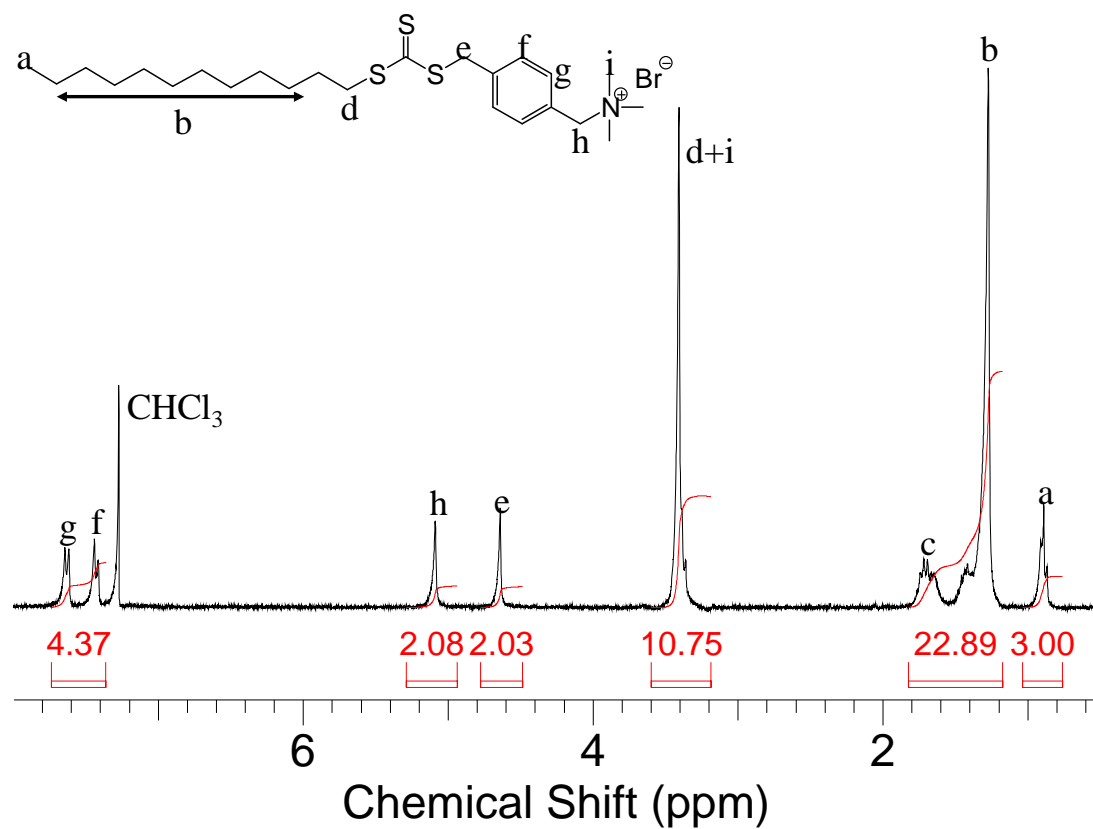

Figure S6. <sup>1</sup>H NMR spectrum in CDCl<sub>3</sub> of RAFT-NMe<sub>3</sub>.

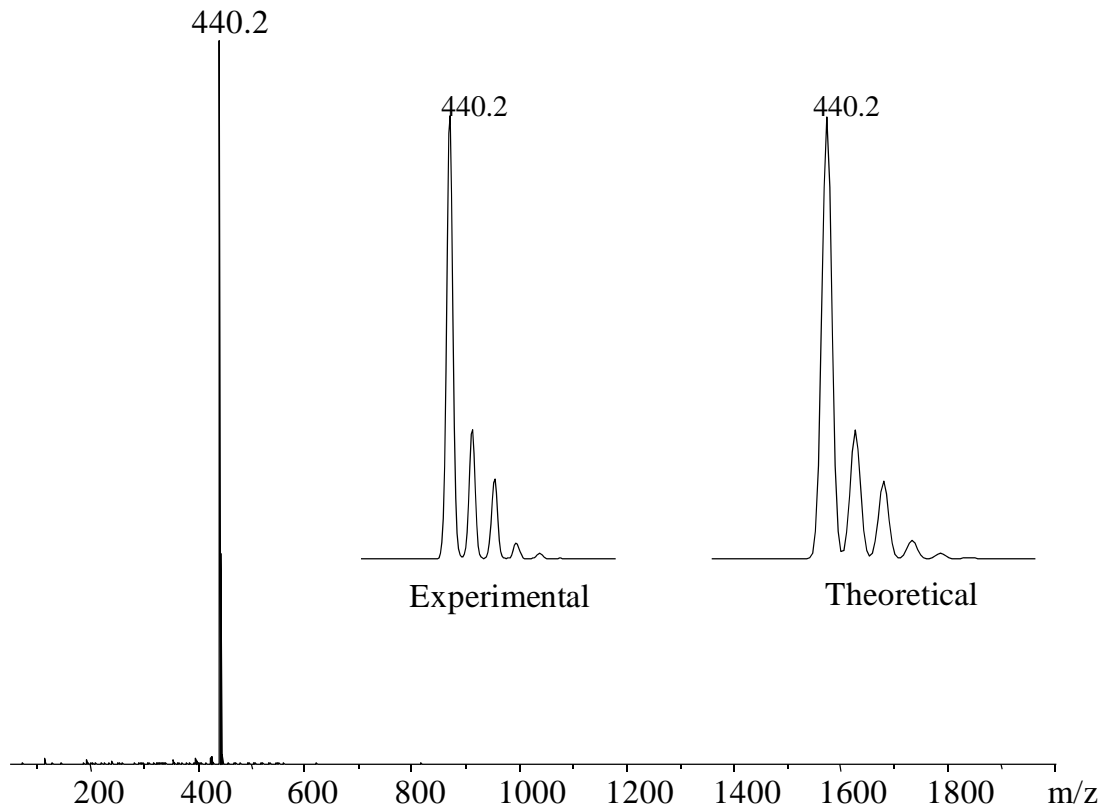

Figure S7. ESI mass spectrum of RAFT-NMe<sub>3</sub>.

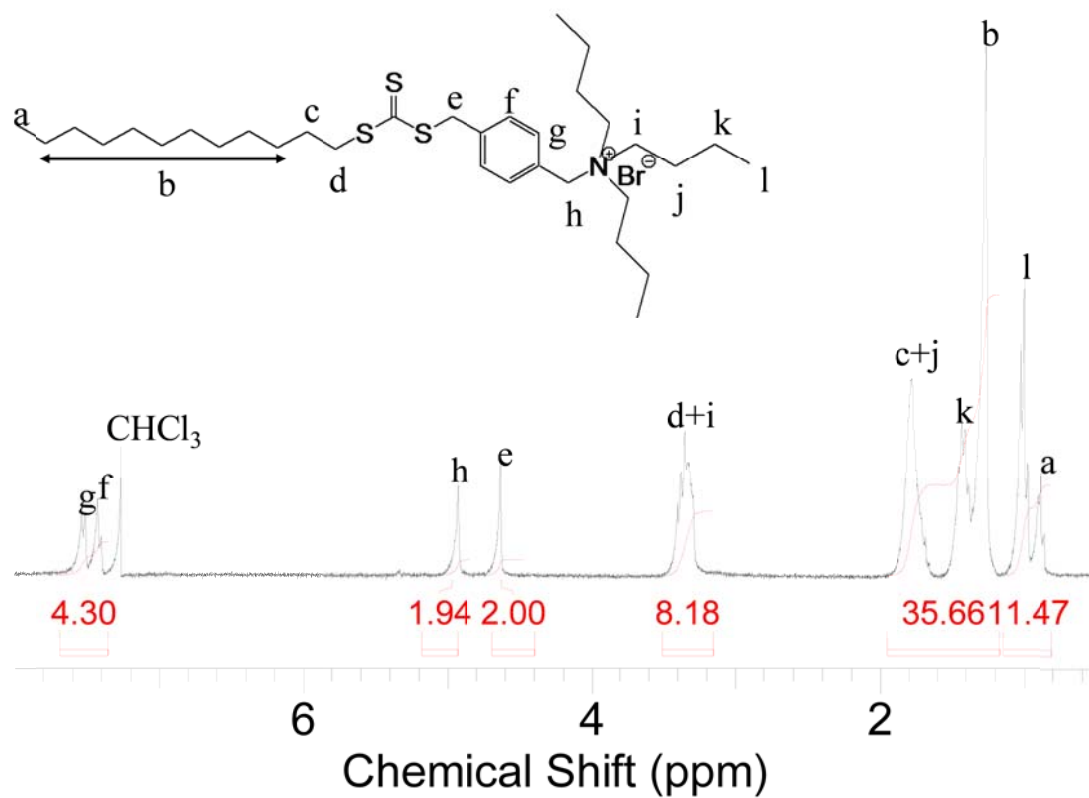

Figure S8. <sup>1</sup>H NMR spectrum in CDCl<sub>3</sub> of RAFT-NBu<sub>3</sub>.

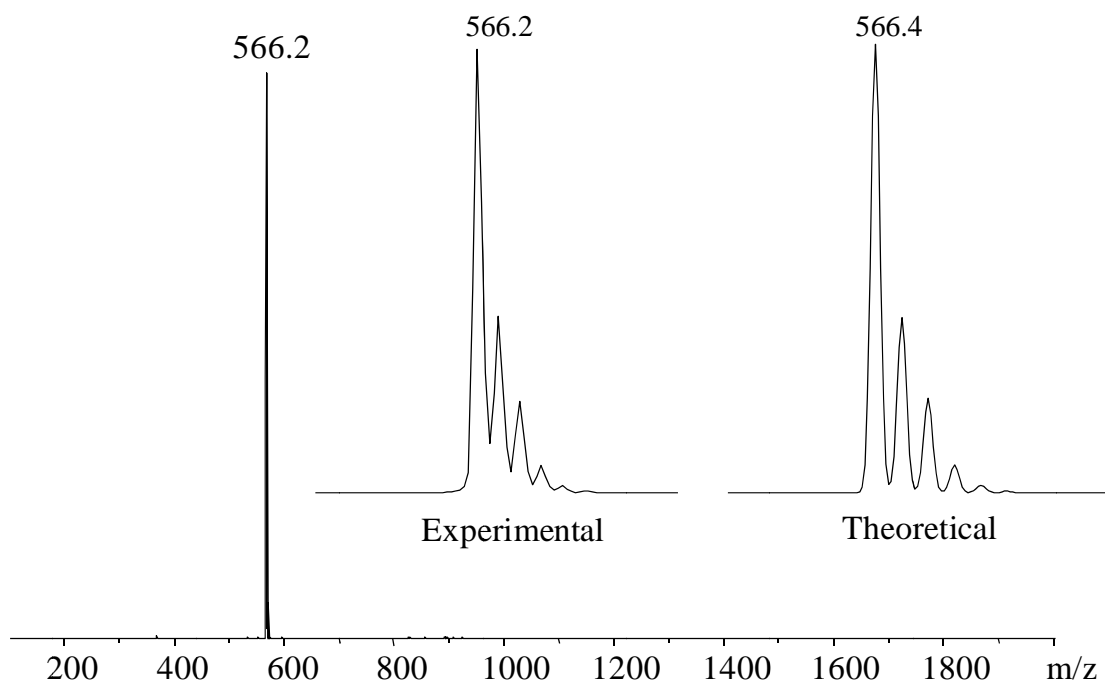

Figure S9. ESI mass spectrum of RAFT-NBu<sub>3</sub>.

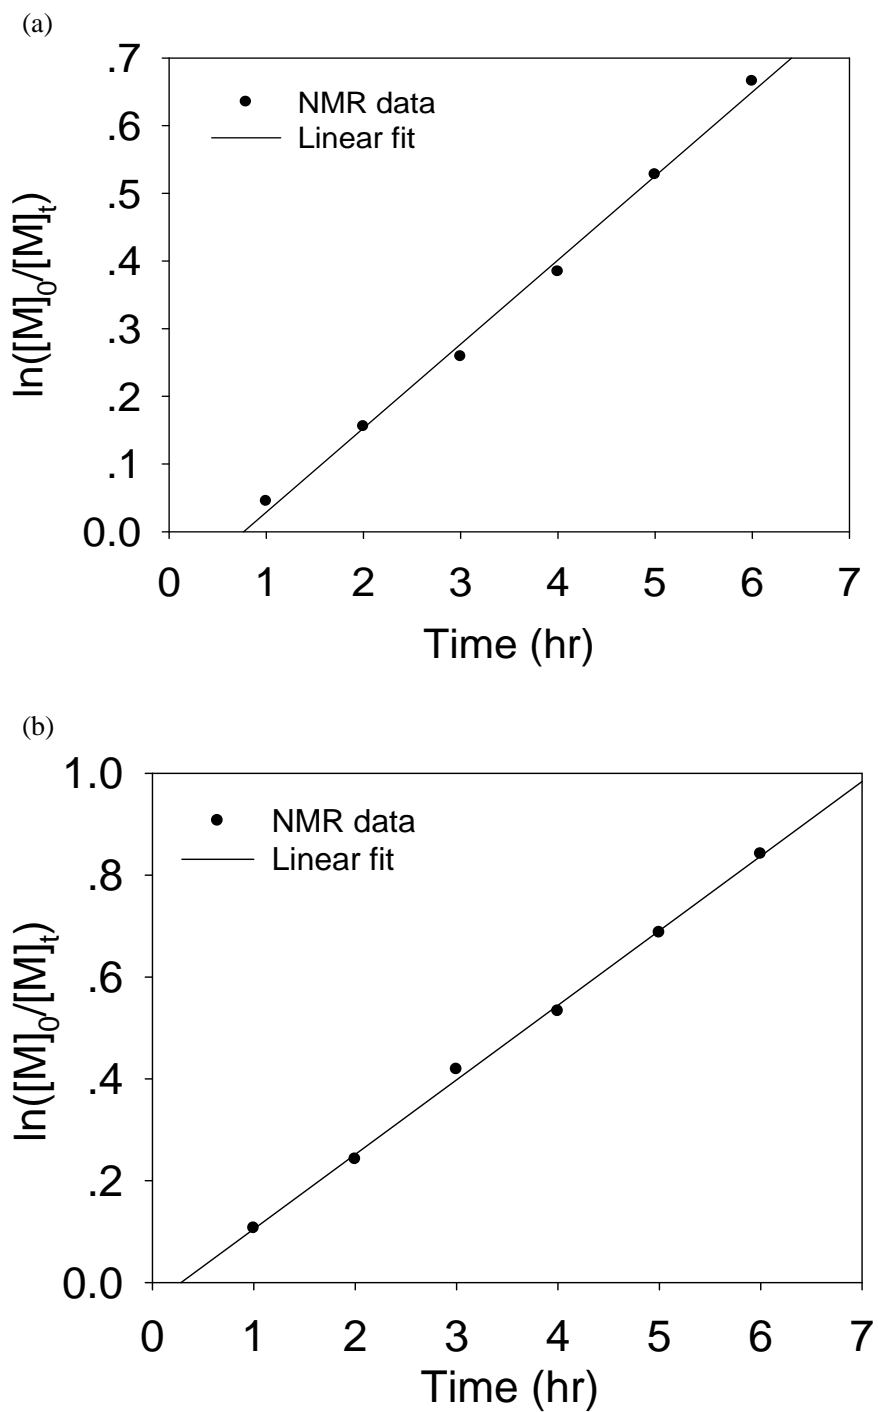

Figure S10. Pseudo first-order kinetic plot for the RAFT bulk polymerization of styrene at 120 °C with a) RAFT-NMe<sub>3</sub> and b) RAFT-NBu<sub>3</sub>. Target molecular weight is 25 kDa. The solid line is a linear fit to the data.



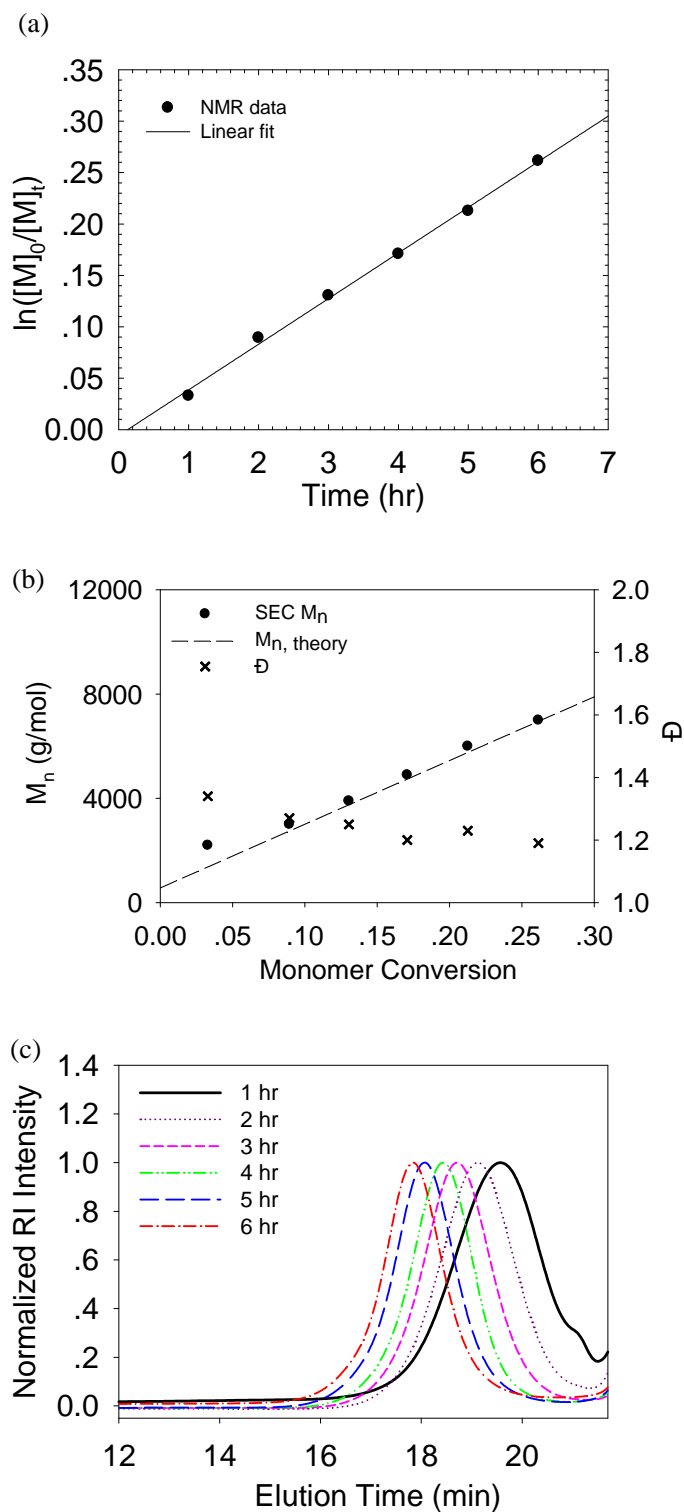

Figure S11. (a) Pseudo first-order kinetic plot for the RAFT bulk polymerization of styrene at 65 °C with RAFT-NEt<sub>3</sub>. Target molecular weight is 25 kDa. The solid line is a linear fit to the data. (b) Plot of  $M_n$  (SEC) and  $\bar{D}$  versus monomer conversion and (c) SEC traces as a function of polymerization time for the same polymerization.

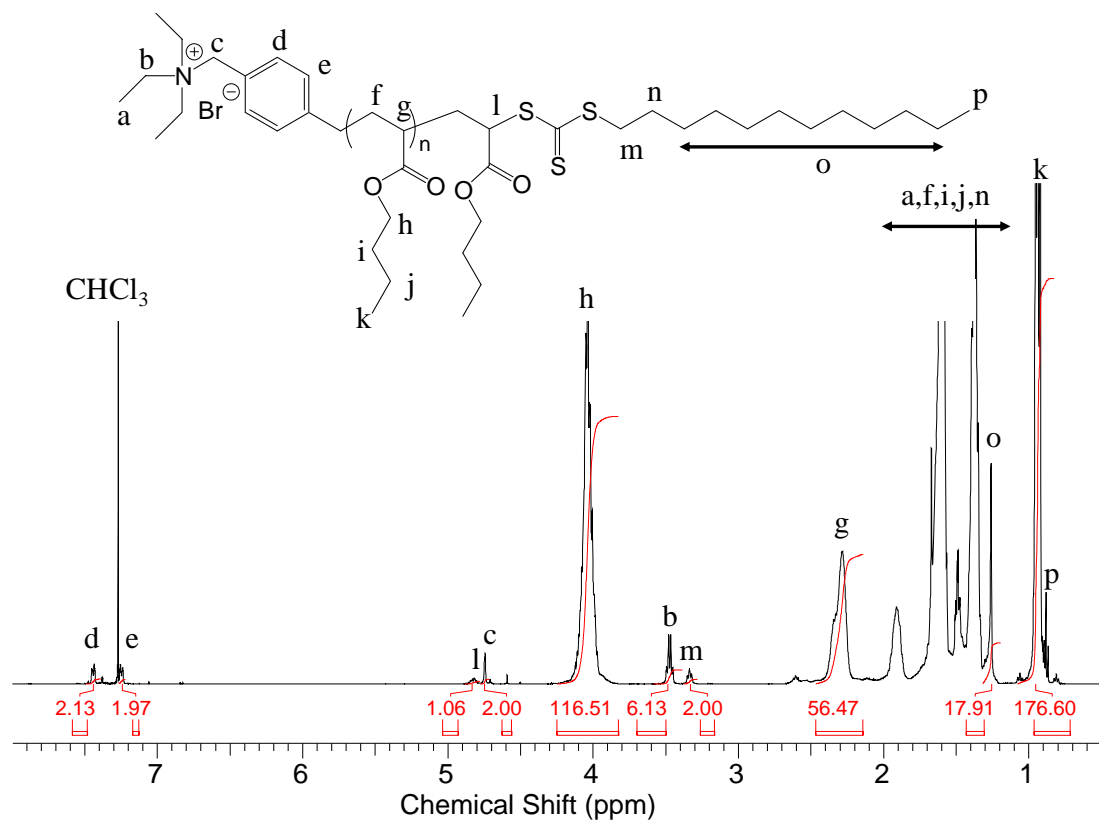

Figure S12. <sup>1</sup>H NMR spectrum of purified PBA (acetone fraction).

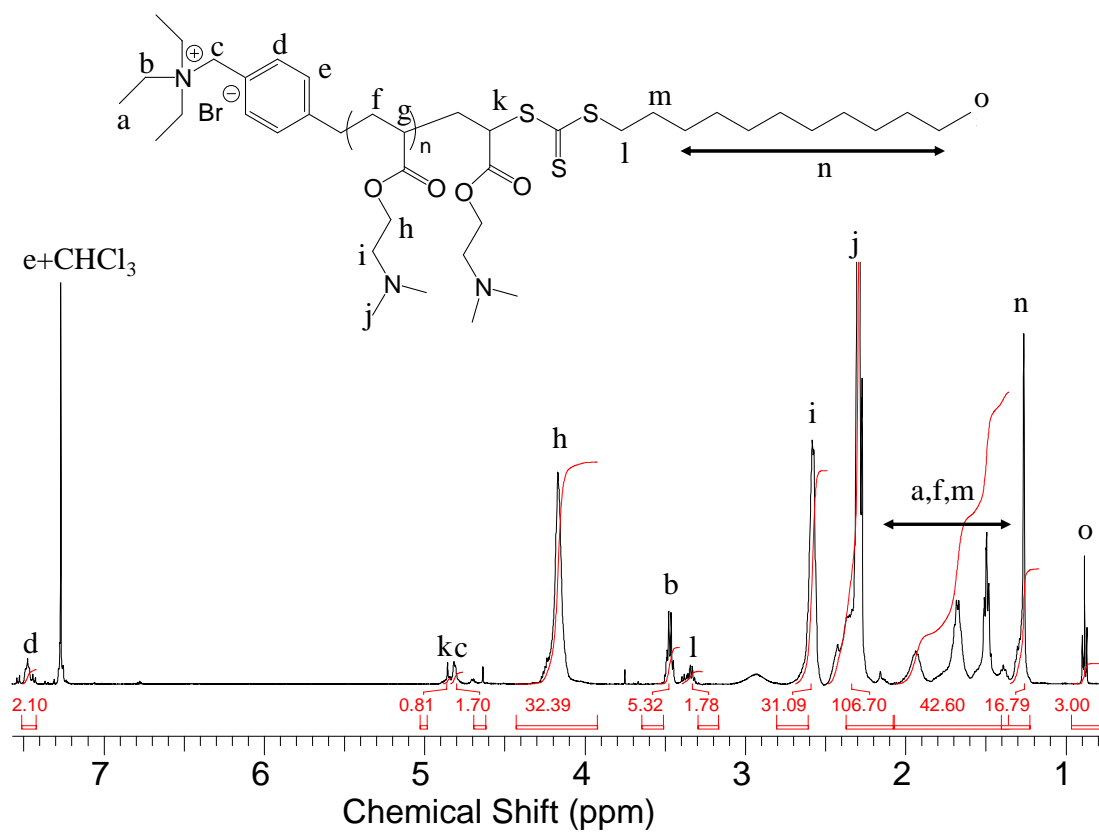

Figure S13. <sup>1</sup>H NMR spectrum of PDMAEA.
